# Supplementary material
Source: PubMed Central journal article supplement (PMC5071561)

**Figure S1**

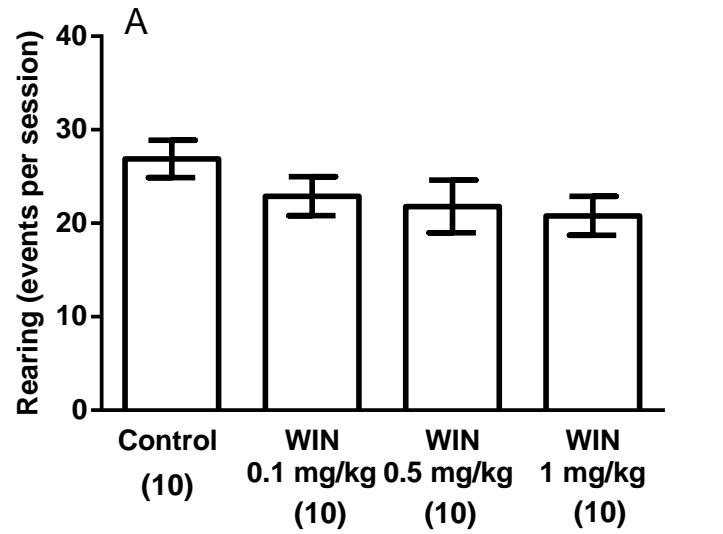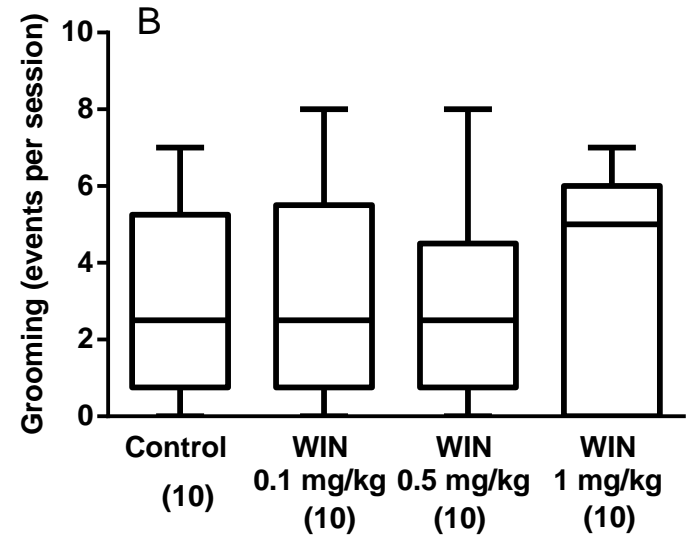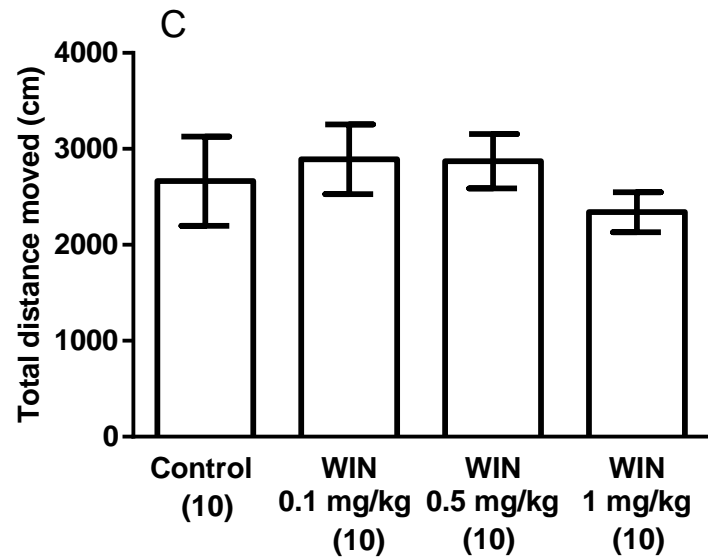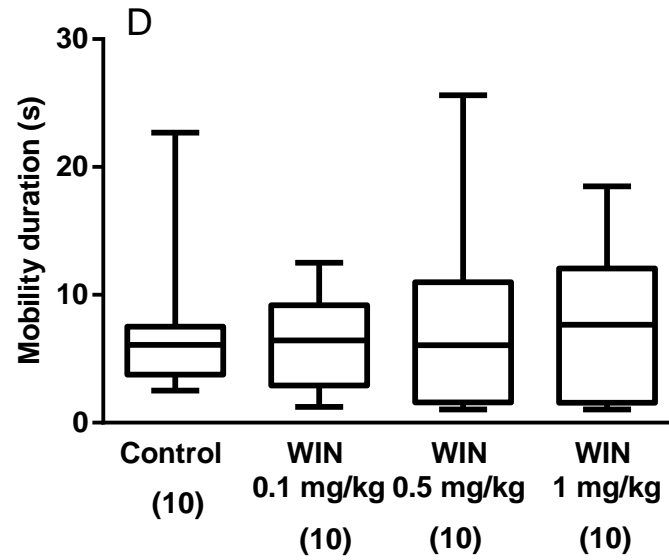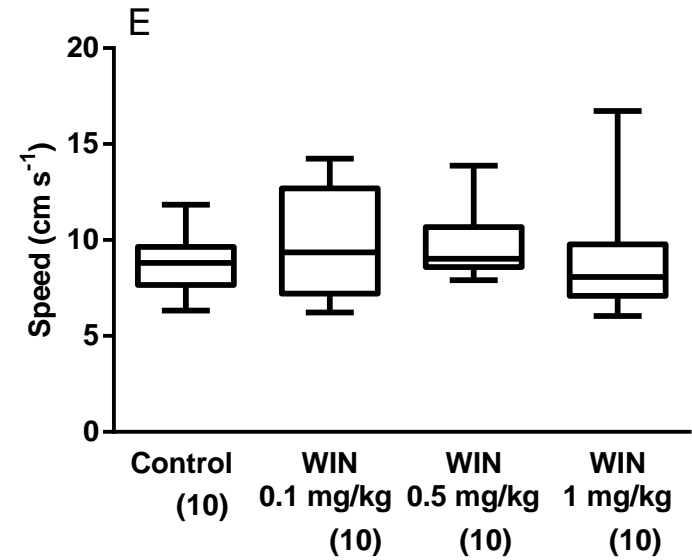

Supplement: BPH-173-3196-s001.pdf [file BPH-173-3196-s001.pdf]

Figure S2

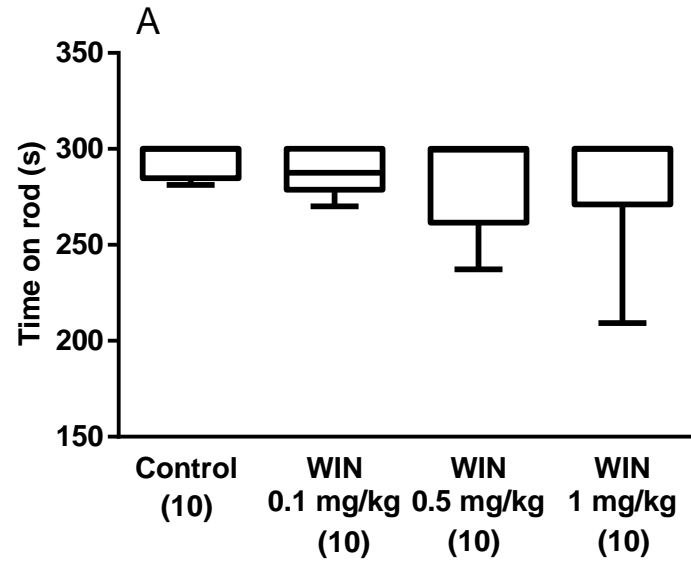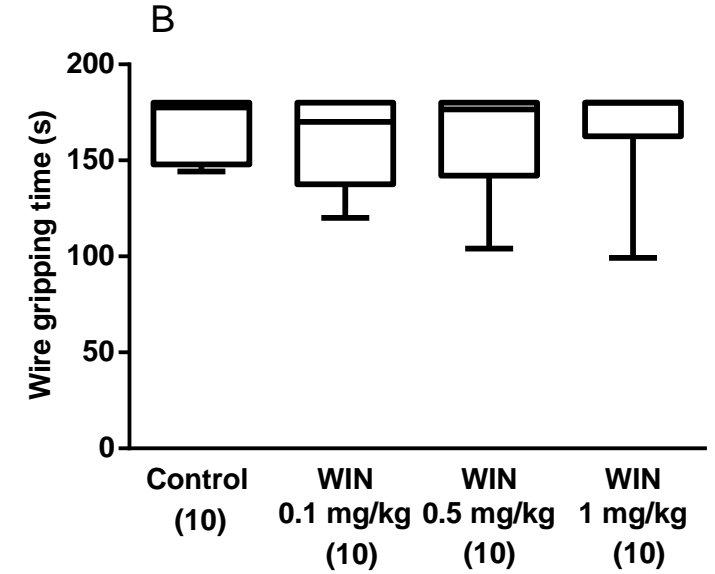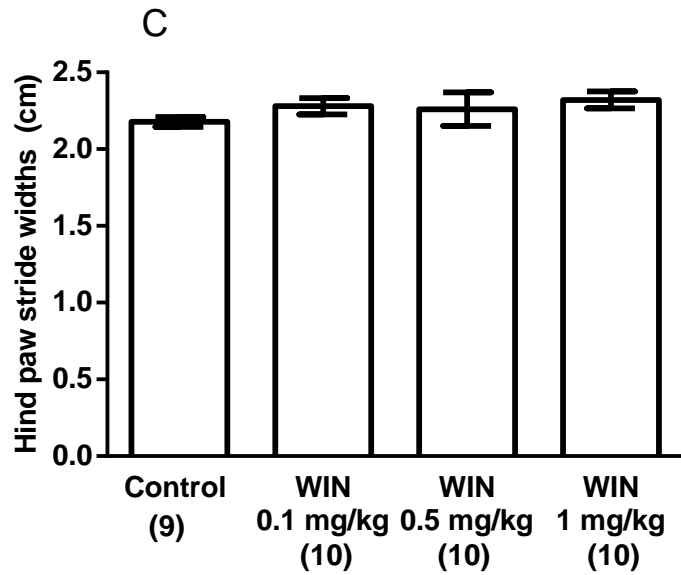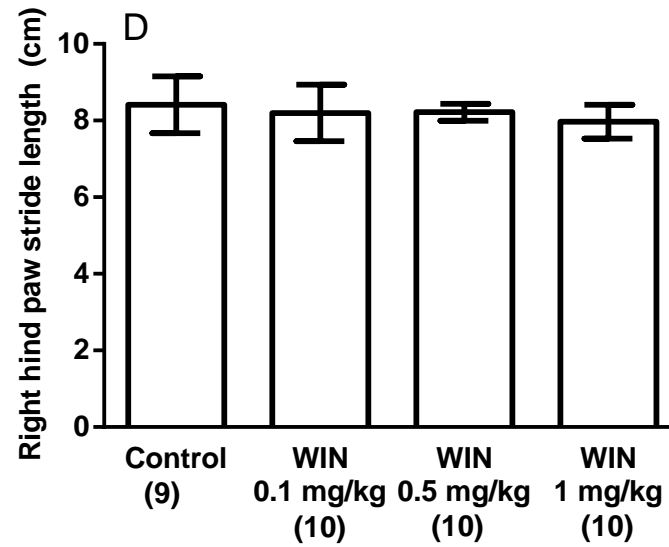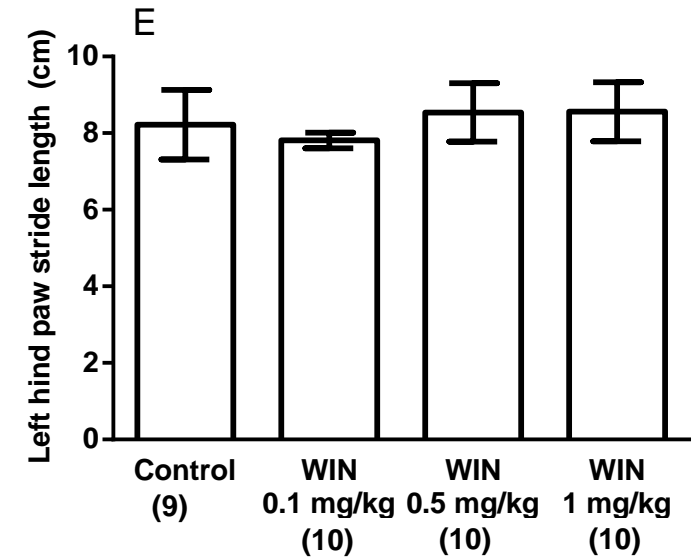

Supplement: BPH-173-3196-s002.pdf [file BPH-173-3196-s002.pdf]

**Figure S3**

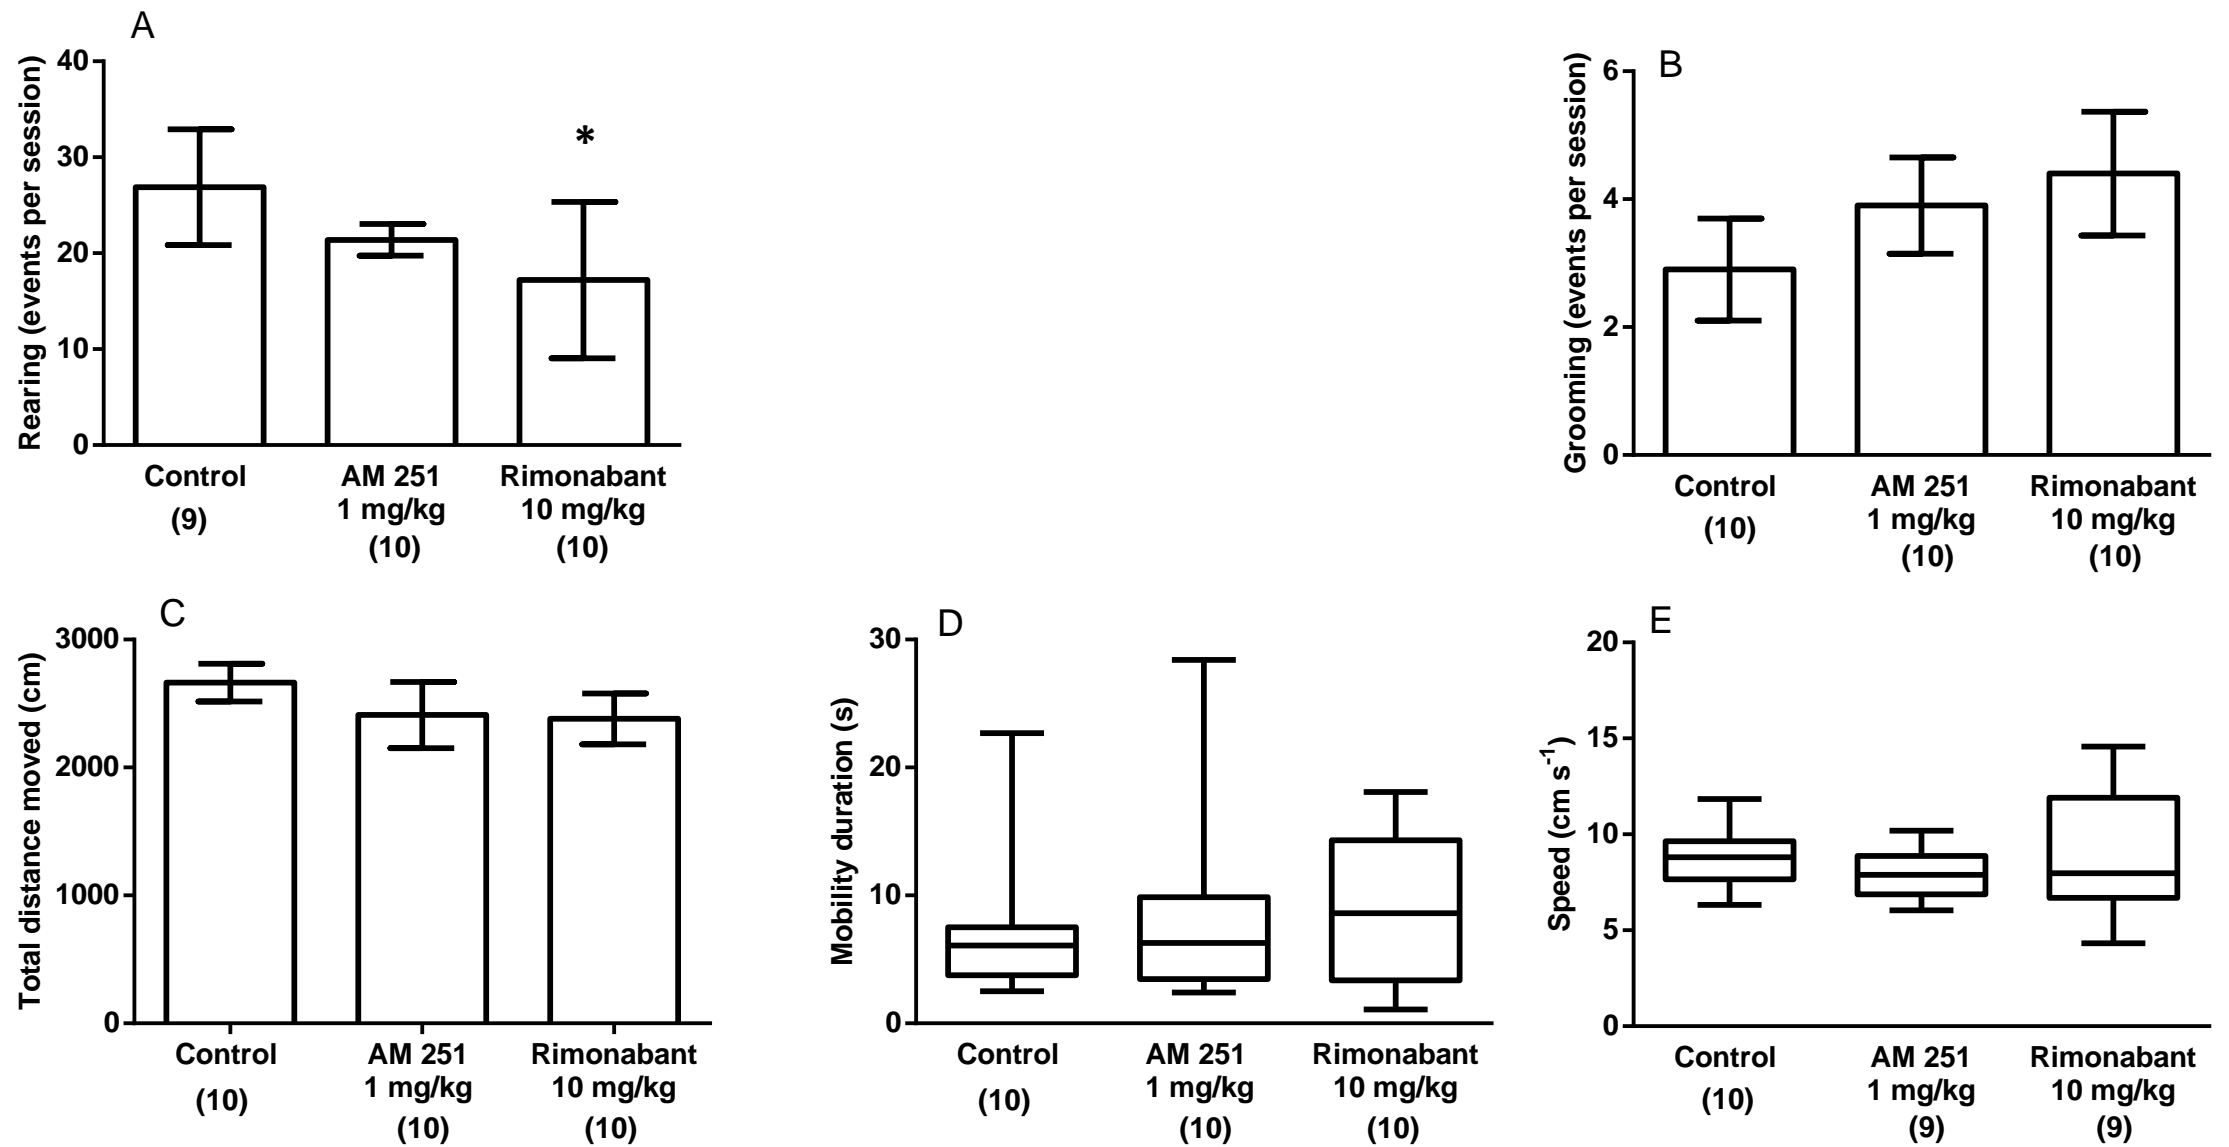

Supplement: BPH-173-3196-s003.pdf [file BPH-173-3196-s003.pdf]

**Figure S4**

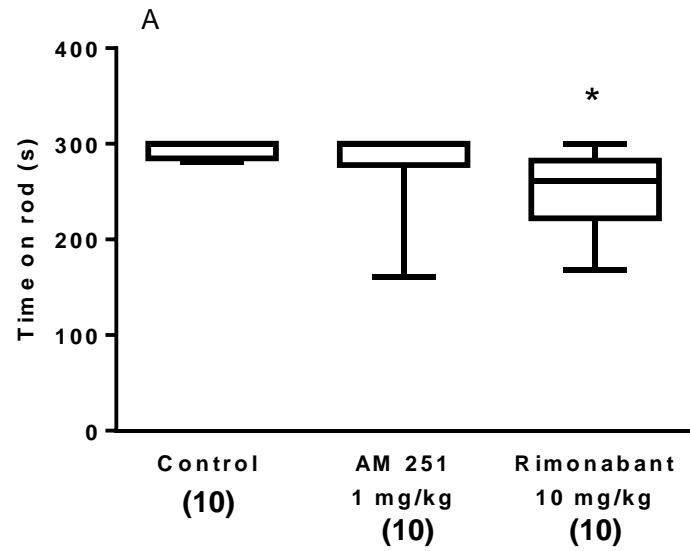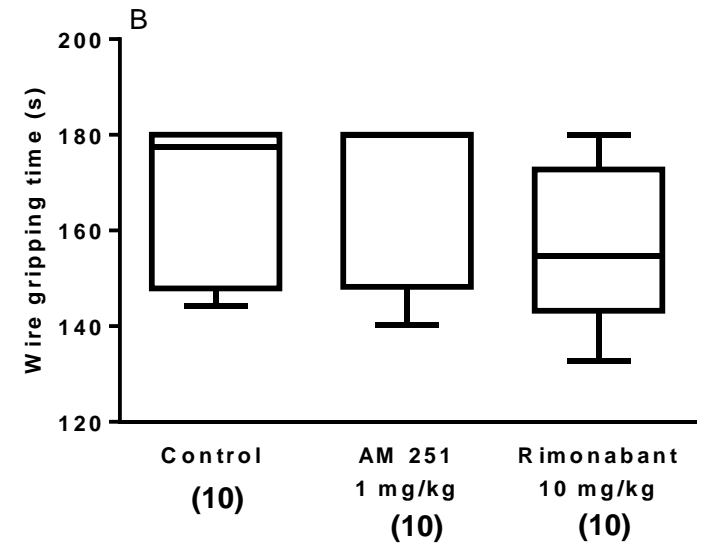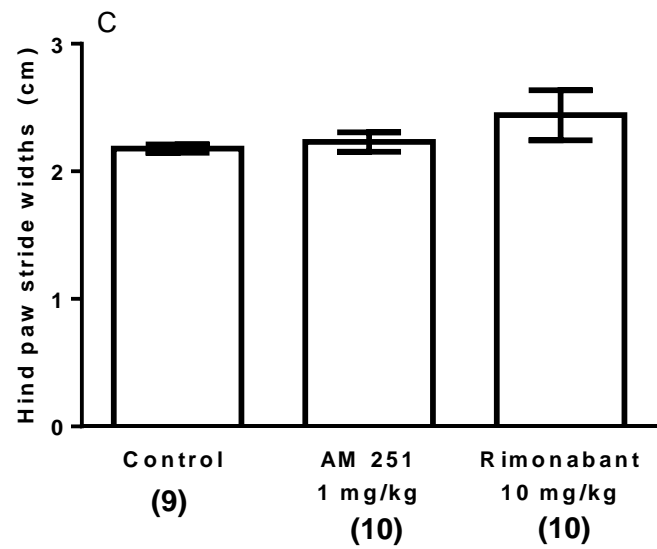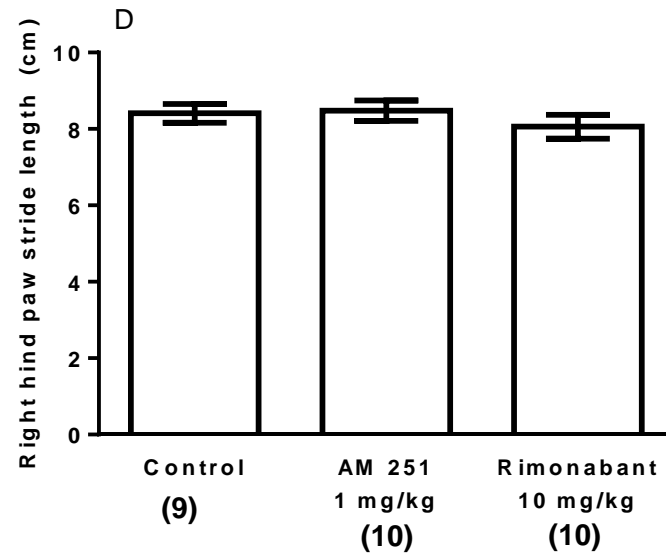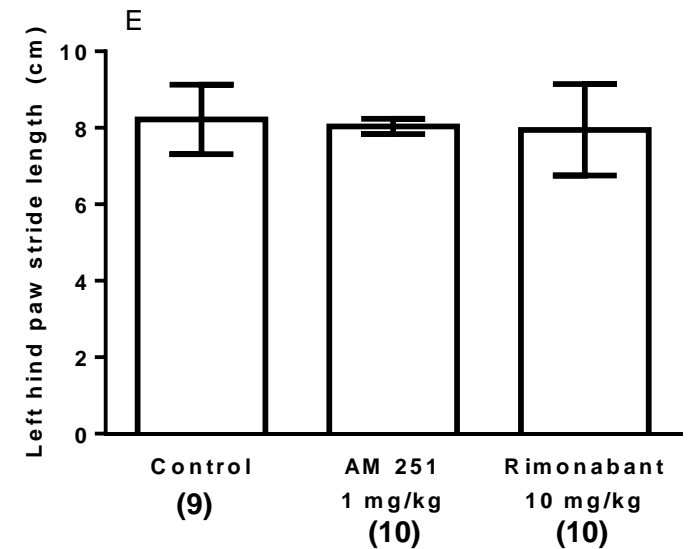

Supplement: BPH-173-3196-s004.pdf [file BPH-173-3196-s004.pdf]
